# Supplementary material for: Molecular Characterization of Streptococcus agalactiae Isolates from Pregnant Women in Kathmandu City
Source: Hindawi journal article supplement (doi:10.1155/2020/4046703), 2020-08-28
Supplement: f1 [file 4046703.f1.pdf]

**Supplementary Table:** Results from antimicrobial susceptibility test interpretive categories and Zone Diameter Breakpoint; for *streptococcus* spp. beta-Hemolytic Group and GBS belongs to a beta hemolytic group

| Antibiotics type | Disk Content (mcg) | Interpretive categories and zone diameter breakpoint (nearest whole in mm) |              |           |
|------------------|--------------------|----------------------------------------------------------------------------|--------------|-----------|
|                  |                    | Susceptible                                                                | Intermediate | Resistant |
| Penicillin       | 10                 | $\geq 24$                                                                  | -            | -         |
| Erythromycin     | 15                 | $\geq 21$                                                                  | 16-20        | $\leq 15$ |
| Chloramphenicol  | 30                 | $\geq 21$                                                                  | 18-20        | $\leq 17$ |
| Doxycycline      | 30                 | $\geq 23$                                                                  | 19-22        | $\leq 18$ |
| Vancomycin       | 30                 | $\geq 17$                                                                  | -            | -         |
| Ertapenem        | 10                 | $\geq 24$                                                                  | -            | -         |
| Linezolid        | 30                 | $\geq 21$                                                                  | -            | -         |
| Levofloxacin     | 5                  | $\geq 17$                                                                  | 14-16        | $\leq 13$ |
| Clindamycin      | 2                  | $\geq 19$                                                                  | 16-18        | $\leq 15$ |
| Ceftriaxone      | 30                 | $\geq 24$                                                                  | -            | -         |
